# Supplementary material for: Infantile Pain Episodes Associated with Novel Nav1.9 Mutations in Familial Episodic Pain Syndrome in Japanese Families
Source: PubMed Central journal article supplement (PMC4880298; doi:10.1371/journal.pone.0154827), 2016-05-25
Supplement: pone.0154827.s001.pdf [file pone.0154827.s001.pdf]

# Locomotor activity

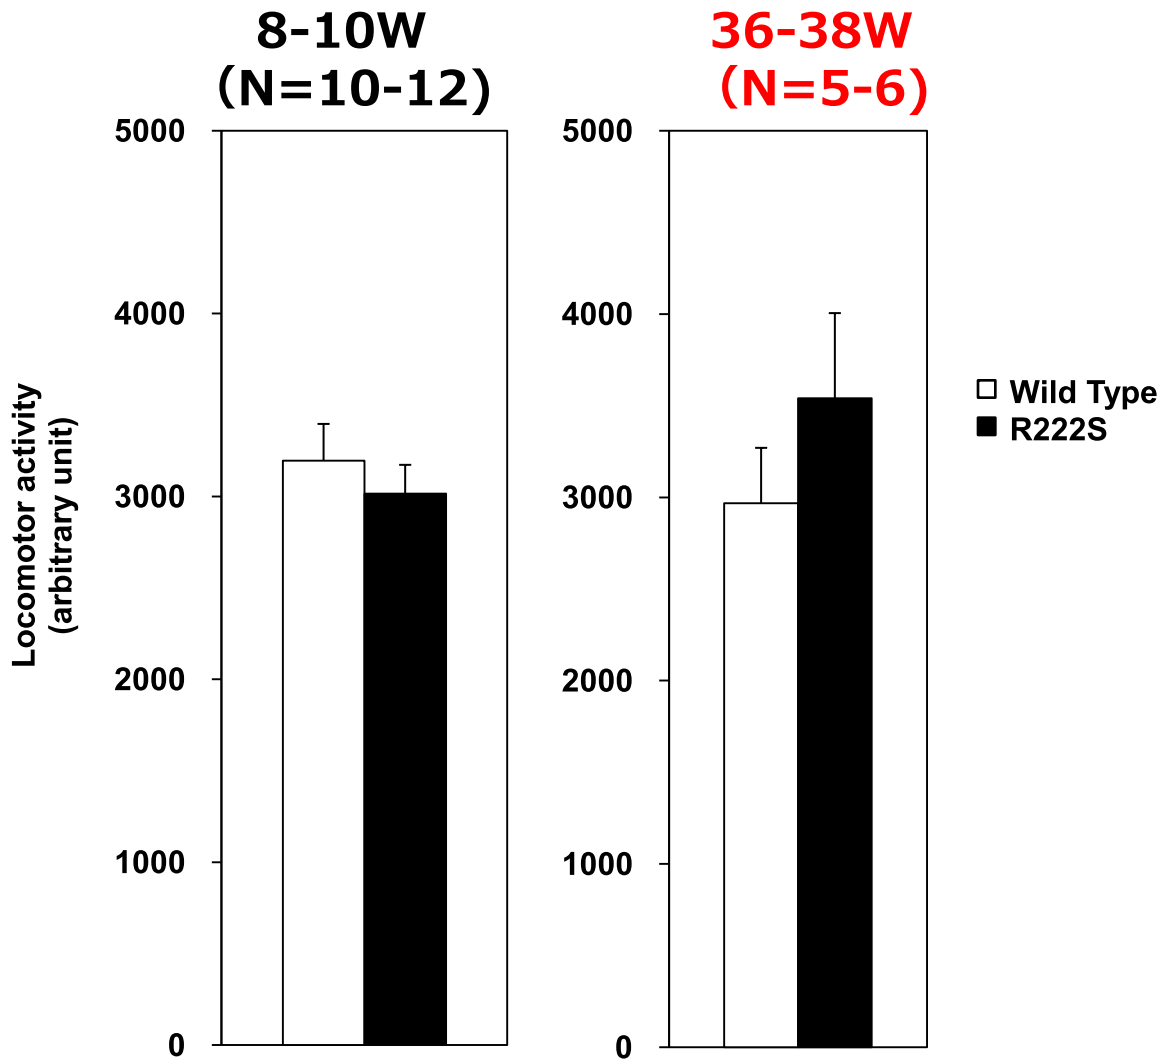

**S1 Fig** Locomotor activity in different age groups.
